# Supplementary material
Source: PubMed Central journal article supplement (PMC3358861)
Supplement: 1202191109_pnas.201202191SI.pdf [file 1202191109_pnas.201202191SI.pdf]

# Supporting Information

Fauser et al. 10.1073/pnas.1202191109

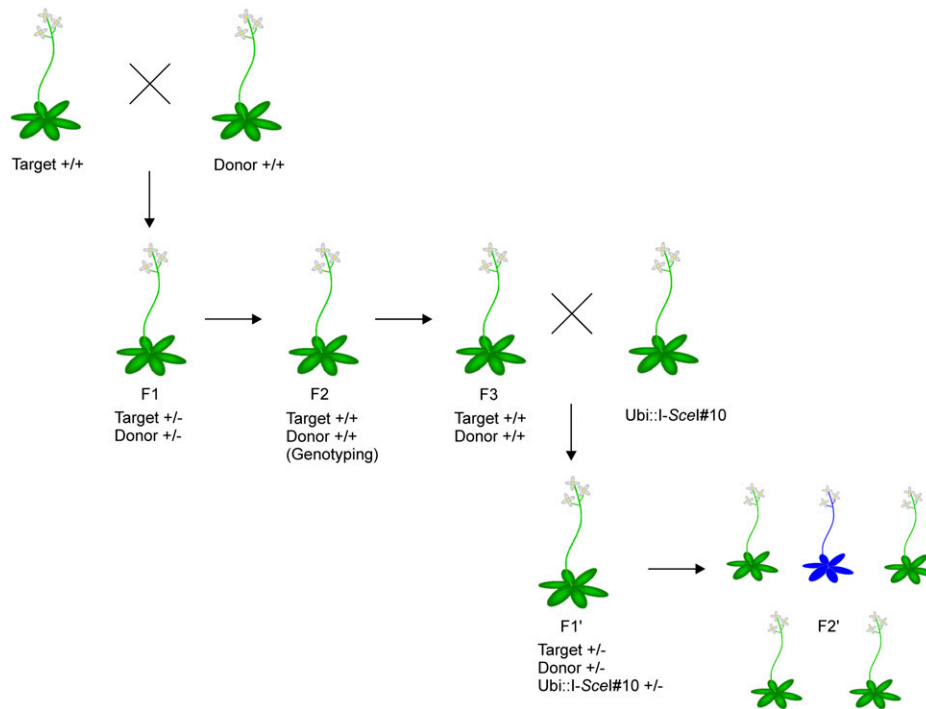

**Fig. S1.** General crossing schema. Single-copy target and donor lines were crossed, leading to a collection of different target/donor combinations (see Fig. 3). F3 plants, homozygous for both constructs, were crossed with the I-SceI expression line Ubi::I-SceI#10, leading to F1' plants that show somatic GT events (blue sectors after histochemical staining, see Fig. 2A). Progeny of these plants (F2') was screened for germinal GT events (completely stained blue plants).

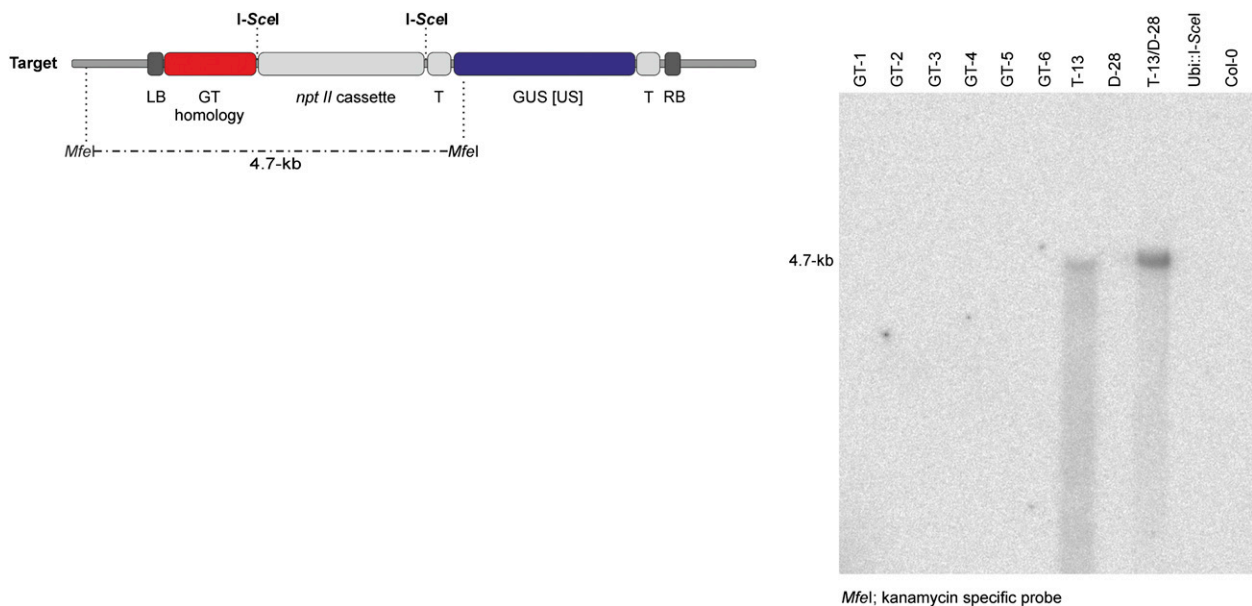

**Fig. S2.** Reintegration of the kanamycin-resistance cassette. Reintegration of the kanamycin-resistance cassette elsewhere in the genome was checked by Southern blotting. I-SceI expression is leading to an excised kanamycin-resistance cassette, leaving back a DSB within the target construct. To exclude reintegration of the kanamycin-resistance cassette elsewhere in the genome, MfeI digested DNA was transferred to a Hybond N+ membrane and probed with a kanamycin specific probe. The 4.7-kb fragment is indicative for the original T-DNA construct as it has been shown in T-13 and T-13/D-28. No other fragment was detectable in all analyzed plants, respectively, GT-1 to GT-6.
